# Supplementary material for: Graphene oxide–coumarin derivative conjugate as activatable nanoprobe for intracellular imaging with one- or two-photon excitation
Source: Royal Society of Chemistry journal article supplement (doi:10.1039/c3tb21656j), 2014-01-01
Supplement: c3tb21656j.pdf [file c3tb21656j.pdf]

## Supporting Information for:

# Graphene oxide-coumarin derivatives conjugate as activatable nanoprobe for intracellular imaging with one or two photon excitation

Huaihong Zhang<sup>a,b</sup>, Rong Huang<sup>a</sup>, Hui Cang<sup>b</sup>, Zhaosheng Cai<sup>b</sup>, Baiwang Sun<sup>a\*</sup>

<sup>a</sup> College of Chemistry and Chemical Engineering, Southeast University, Nanjing 211189, China

<sup>b</sup> School of Chemistry and Biology, Yancheng Institute of Technology, Yancheng 224051, China

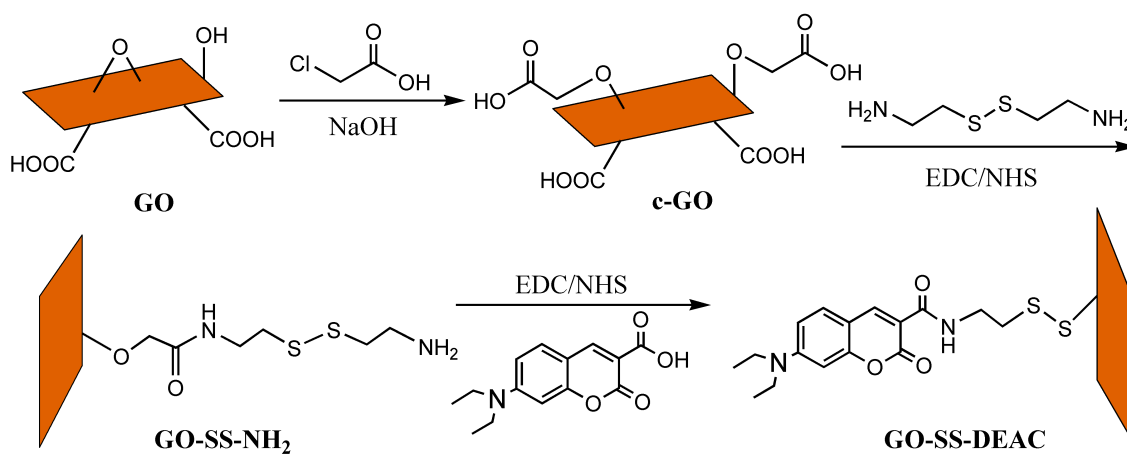

**Scheme S1.** Schematic representation of the synthesis route of GO-SS-DEAC.

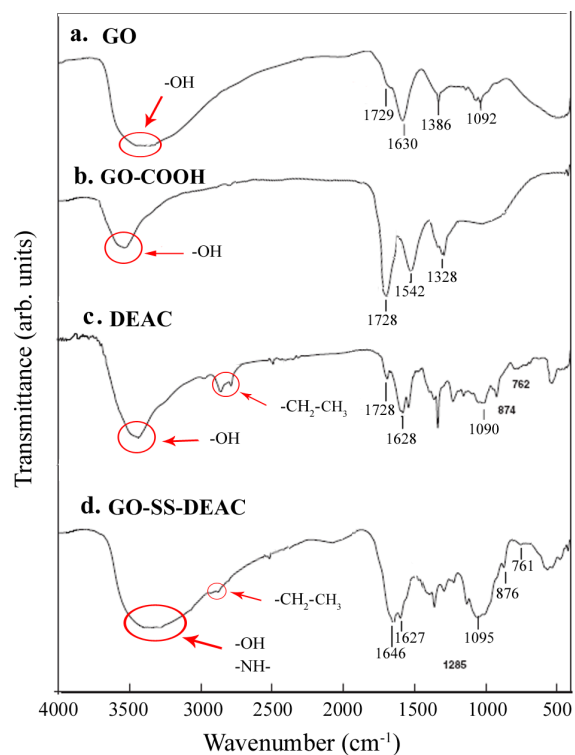

**Figure S1.** FT-IR spectra of (a) GO, (b) GO-COOH, (c) DEAC, and (d) GO-SS-DEAC.

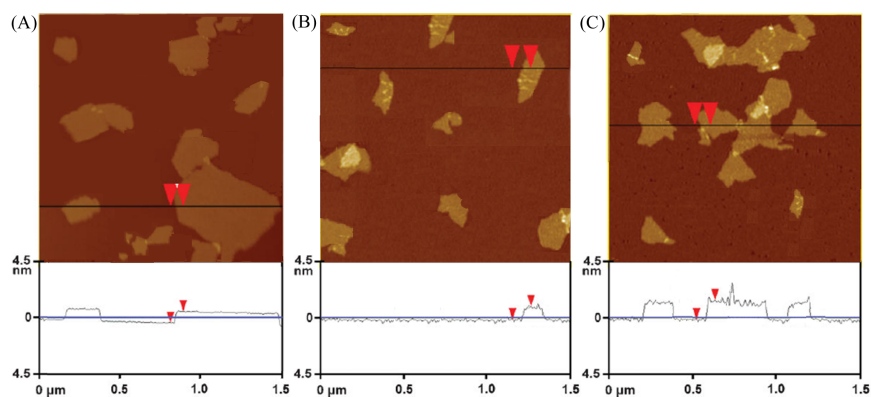

**Figure S2.** AFM images of as-prepared GO (A), cGO (B), and GO-SS-DEAC (C).

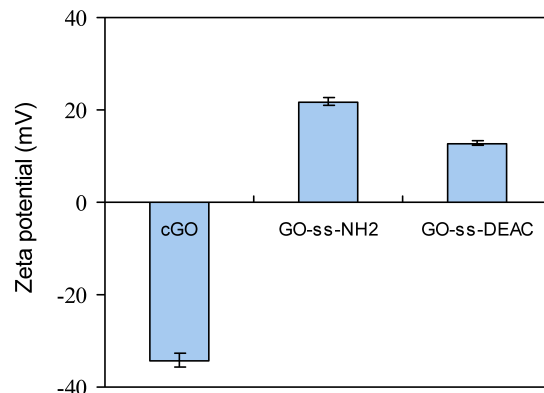

**Figure S3.** Zeta potential histogram of cGO, GO-ss-NH<sub>2</sub> and GO-ss-DEAC. Error bars were based on triplicated measurements. Data are represented as mean ± SD (n = 3).

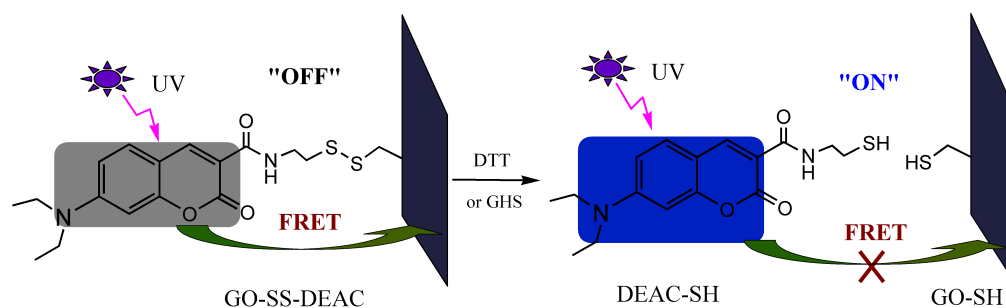

**Scheme S2.** Schematic representation fluorescence "off-to-on" mechanism of GO-SS-DEAC nanoprobe.

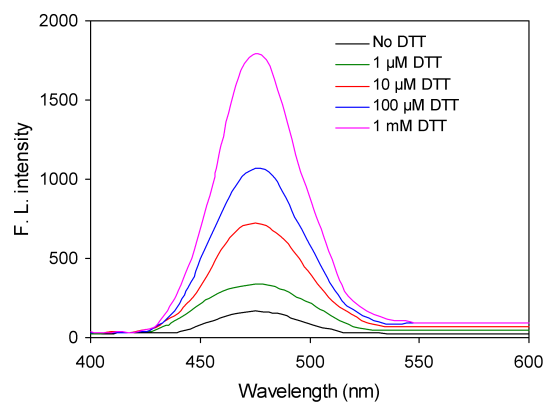

**Figure S4.** FL spectra of GO-SS-DEAC upon incubation with different concentrations of DTT.

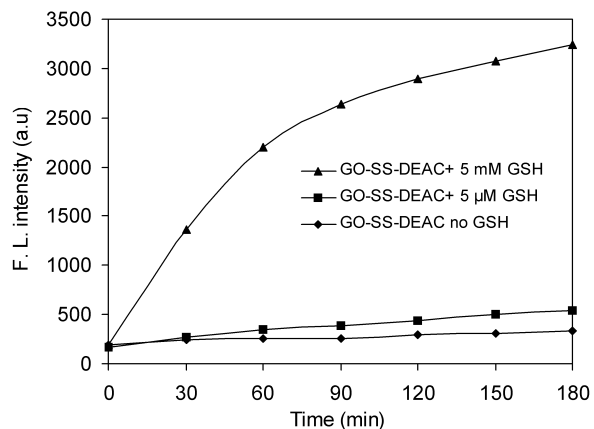

**Figure S5.** Time-dependent reduction of the activatable GO-SS-DEAC probe under different concentration of GSH.

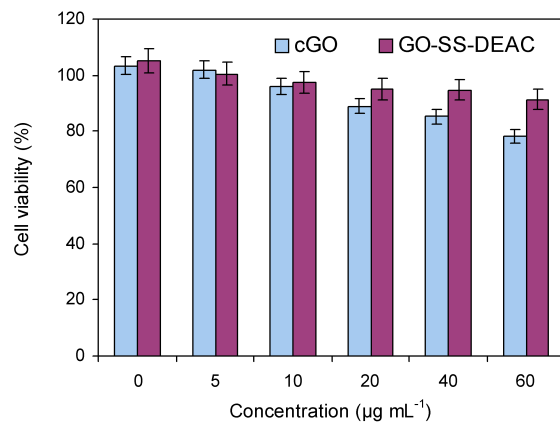

**Figure S6.** Cellular cytotoxicity of cGO and GO-SS-DEAC to HeLa cells. HeLa cells were incubated with different concentrations of graphene derivatives for 24 h. Data are represented as mean  $\pm$  SD (n = 3).

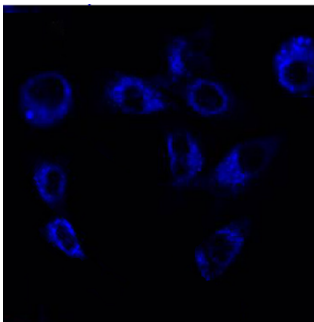

**Figure S7.** Two-photon fluorescence image of HeLa cells incubated with 20  $\mu\text{g/mL}$  GO-SS-DEAC for 3 h at 37  $^{\circ}\text{C}$  ( $\lambda_{\text{ex}} = 800 \text{ nm}$ ).
